# Supplementary material for: Association of low blood pressure with suicidal ideation: a cross-sectional study of 10,708 adults with normal or low blood pressure in Korea
Source: PubMed Central journal article supplement (PMC5831223; doi:10.1186/s12889-018-5106-5), 2018-03-01

Model IV

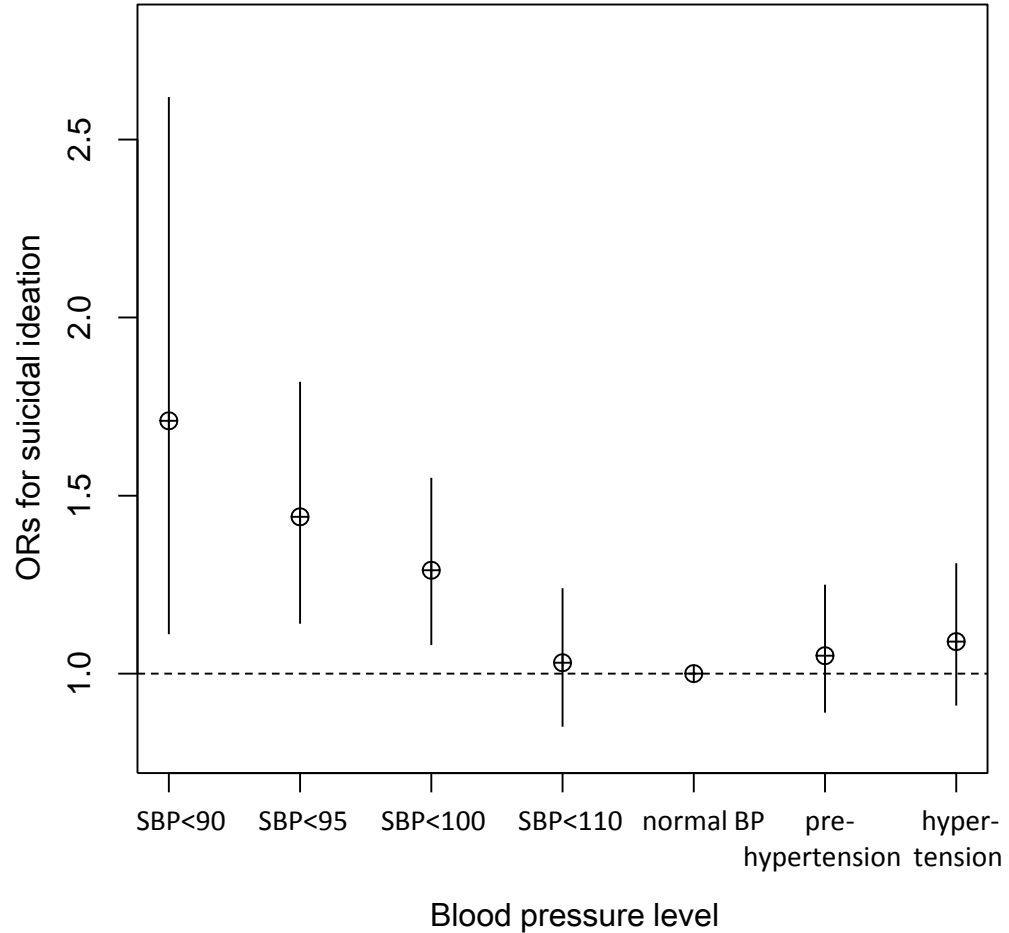

Model V

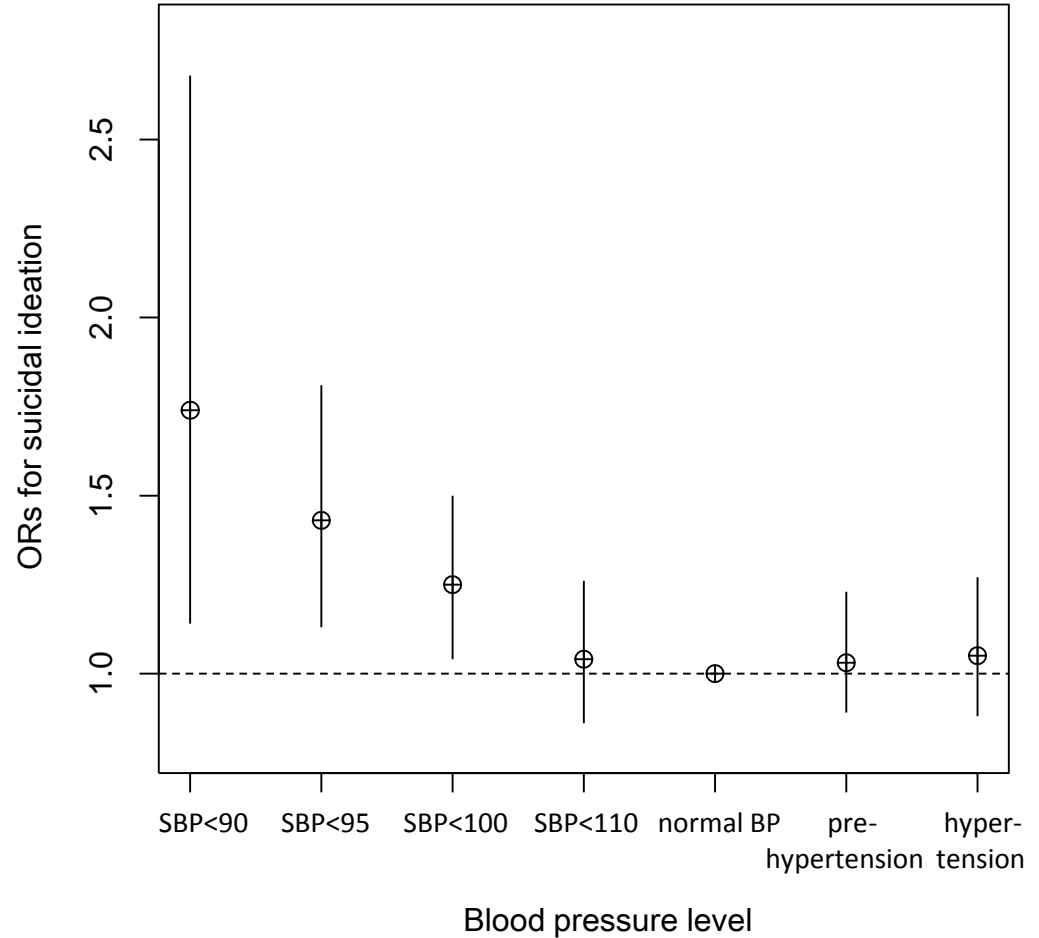

Supplement: 12889_2018_5106_MOESM2_ESM.pdf [file 12889_2018_5106_MOESM2_ESM.pdf]
